# Supplementary material for: Ctdnep1 and Eps8L2 regulate dorsal actin cables for nuclear positioning during cell migration
Source: PubMed Central journal article supplement (PMC8043254; doi:10.1016/j.cub.2021.01.007), 2021-04-12
Supplement: mmc1.pdf [file mmc1.pdf]

**Current Biology, Volume 31**

**Supplemental Information**

**Ctdnep1 and Eps8L2 regulate dorsal actin cables  
for nuclear positioning during cell migration**

**Francisco J. Calero-Cuenca, Daniel S. Osorio, Sofia Carvalho-Marques, Sreerama Chaitanya Sridhara, Luis M. Oliveira, Yue Jiao, Jheimmy Diaz, Cátia S. Janota, Bruno Cadot, and Edgar R. Gomes**



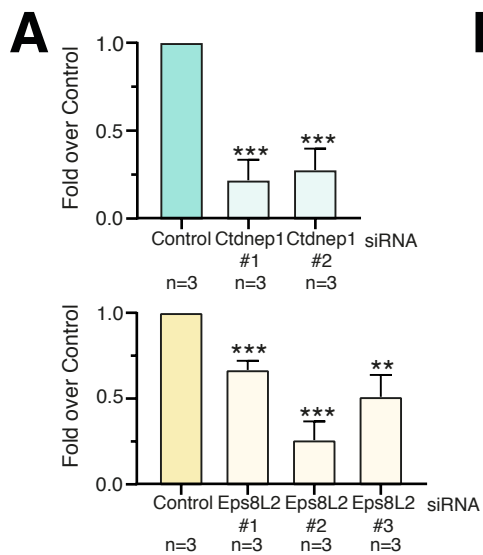

**B** Yeast-2-Hybrid screen main interactions:

| Clone Name | Gene Name | %IdSp | %Id3p | PBS |
|------------|-----------|-------|-------|-----|
| pB27_A-38  | ADRBK1    | 99.8  | 99.8  | D   |
| pB27_A-28  | C18orf24  | 98.6  | 98.6  | D   |
| pB27_A-39  | CDCA3     | 100   | 99.8  | A   |
| pB27_A-107 | COPE      | 99.6  | 99.6  | D   |
| pB27_A-77  | CSH1      | 99.8  | 99.4  | D   |
| pB27_A-62  | DDX20     | 98.6  |       | D   |
| pB27_A-42  | EFEMP1    | 100   | 100   | D   |
| pB27_A-95  | EPS8L2    | 99.7  | 99.7  | B   |
| pB27_A-89  | MGC12981  | 100   | 98.9  | D   |
| pB27_A-24  | MKNK2     | 100   | 99.9  | D   |
| pB27_A-2   | MKRN1     | 93.7  | 92.3  | D   |
| pB27_A-45  | NAIP      | 97.5  | 98    | D   |
| pB27_A-71  | OSBPL2    | 99.3  | 99.6  | C   |
| pB27_A-21  | PARN      | 100   | 99.1  | D   |
| pB27_A-86  | PDIK1L    | 99.4  | 99.4  | D   |
| pB27_A-11  | THAP4     | 99.1  | 99.1  | D   |
| pB27_A-15  | ZDHHC17   | 100   | 100   | D   |

- A** Very high confidence in the interaction  
**B** High confidence in the interaction  
**C** Good confidence in the interaction  
**D** Moderate confidence in the interaction

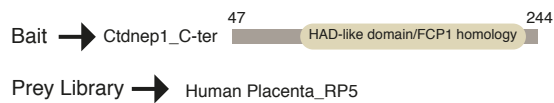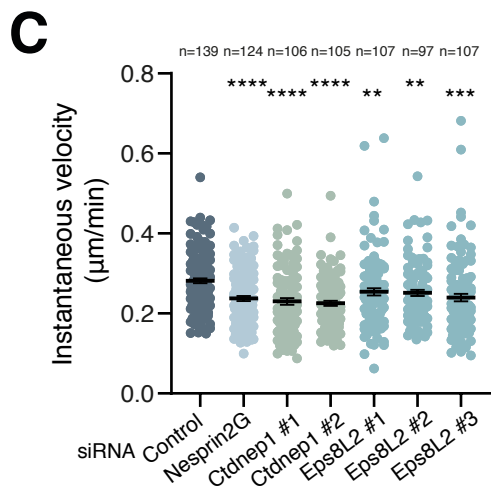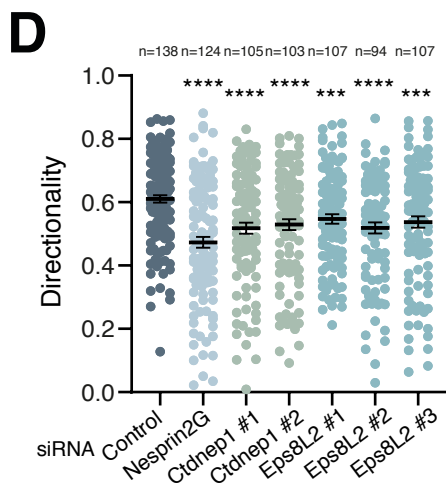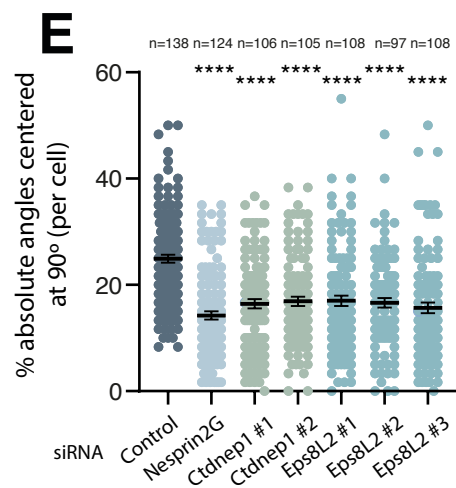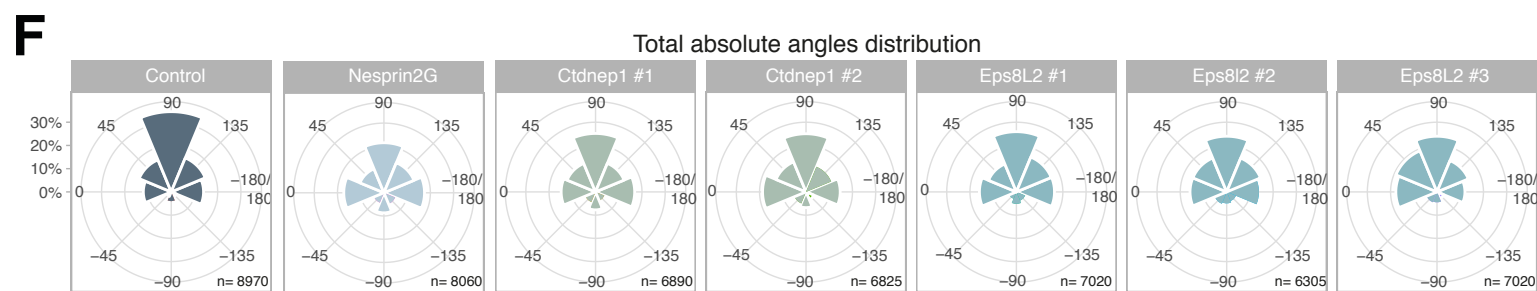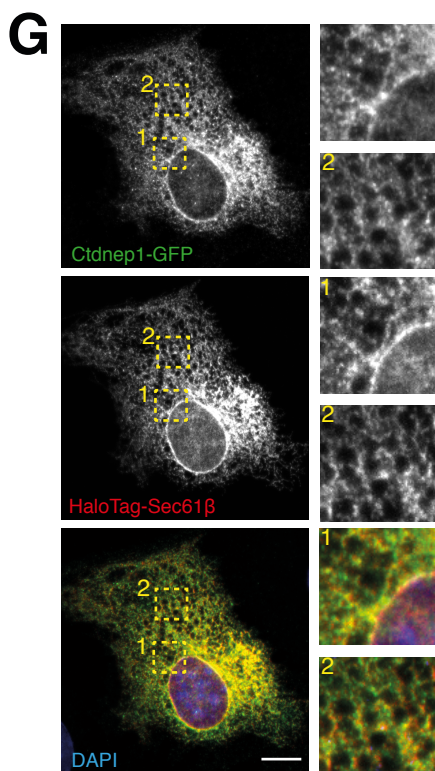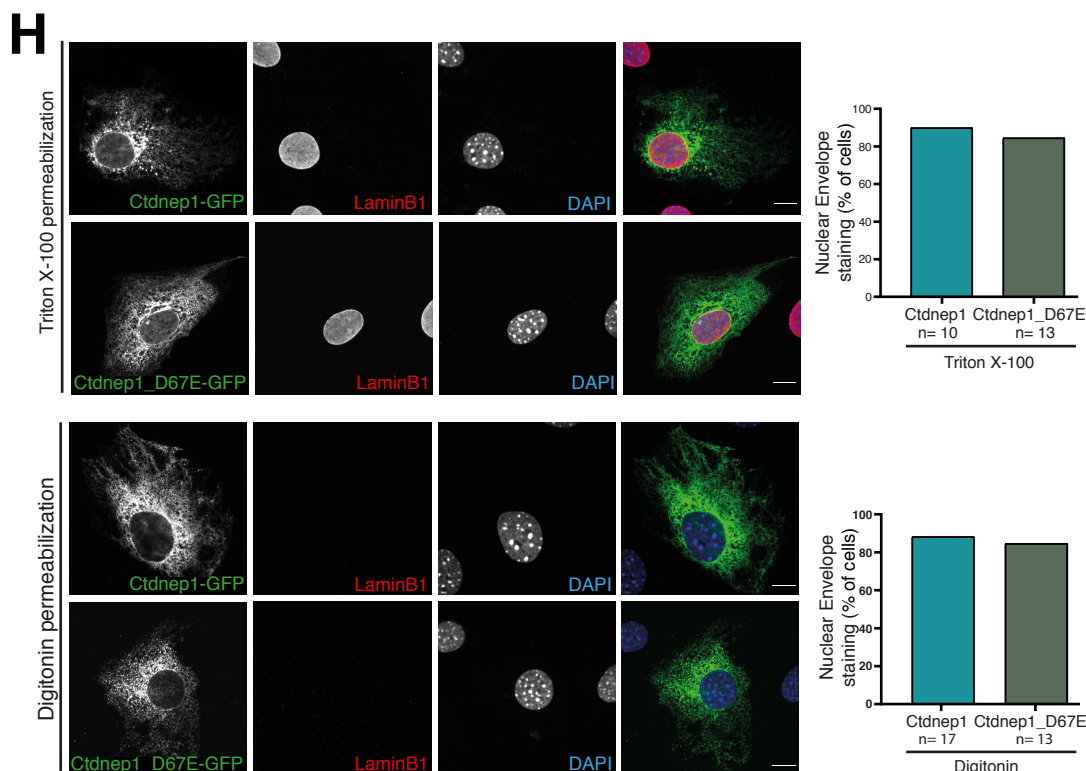

**Figure S1. Depletions of Ctdnep1 and Eps8L2 affect cell migration and directionality. Related to Figure 1.** (A) Ctdnep1 mRNA quantification (top) in 3T3 fibroblasts transfected with Control, Ctdnep1 #1 and Ctdnep1 #2 siRNAs measured by RT-qPCR. Eps8L2 mRNA quantification (bottom) in 3T3 fibroblasts transfected with Control, Eps8L2 #1, Eps8L2 #2 and Eps8L2 #3 siRNAs measured by RT-qPCR. (B) Yeast Two-Hybrid screening performed with Ctdnep1\_C-ter as the bait and human placenta library as prey. The table shows the main interactions observed in the screening. Each interaction presents a Predicted Biological Score (PBS) that is computed to assess the interaction reliability. This score represents the probability of an interaction to be non-specific: it is an e-value, primarily based on the comparison between the number of independent prey fragments found for an interaction and the chance of finding them at random (background noise). %Id5p and %Id3p indicates the % identity of the prey fragment sequences with the gene reference sequence. Average instantaneous velocity (C) and directionality (D) during wound closure in cells at the wound edge treated with Control, Nesprin2G, Ctdnep1 and Eps8L2 siRNAs. (E) Percentage of angles per cell with a value between  $67.5^{\circ}$  and  $112^{\circ}$  (angles centered at  $90^{\circ}$ ) relative to the wound edge (absolute angle) during wound closure assays in cells treated with Control, Nesprin2G, Ctdnep1 and Eps8L2 siRNAs. (F) Total absolute angles (relative to the wound edge) distribution in wound closure assays in cells treated with Control, Nesprin2G, Ctdnep1 and Eps8L2 siRNAs. (G) Representative images of wound-edge wildtype fibroblasts stimulated with LPA and microinjected with Ctdnep1-GFP and HaloTag-Sec61 $\beta$  stained for GFP (green), HaloTag (red, endoplasmic reticulum) and Dapi (blue, nucleus). The dashed yellow squares indicate the region of the insets shown in the right panels. (H) Representative image of wound-edge fibroblasts stimulated with LPA and microinjected with Ctdnep1-GFP or Ctdnep1\_D67E-GFP fixed and permeabilized with Triton X-100 or digitonin and stained for GFP (green), LaminB (red) and DAPI (blue, nucleus). Plots indicating the quantification of nuclear envelope staining are shown on the right. Triton treatment permeabilizes the plasma membrane and nuclear envelope whereas digitonin only permeabilizes the plasma membrane and not the nuclear envelope. Scale bar: 10  $\mu$ m. Data are represented as mean  $\pm$  SEM in A, C, D and E. The n value means number of experiments (A), number of analysed cells (C, D, E and H) or number of total angles analysed (F). Statistics was performed by unpaired t test: \* $p < 0.05$ , \*\* $p < 0.01$ , \*\*\* $p < 0.001$ , \*\*\*\* $p < 0.0001$ .

**A**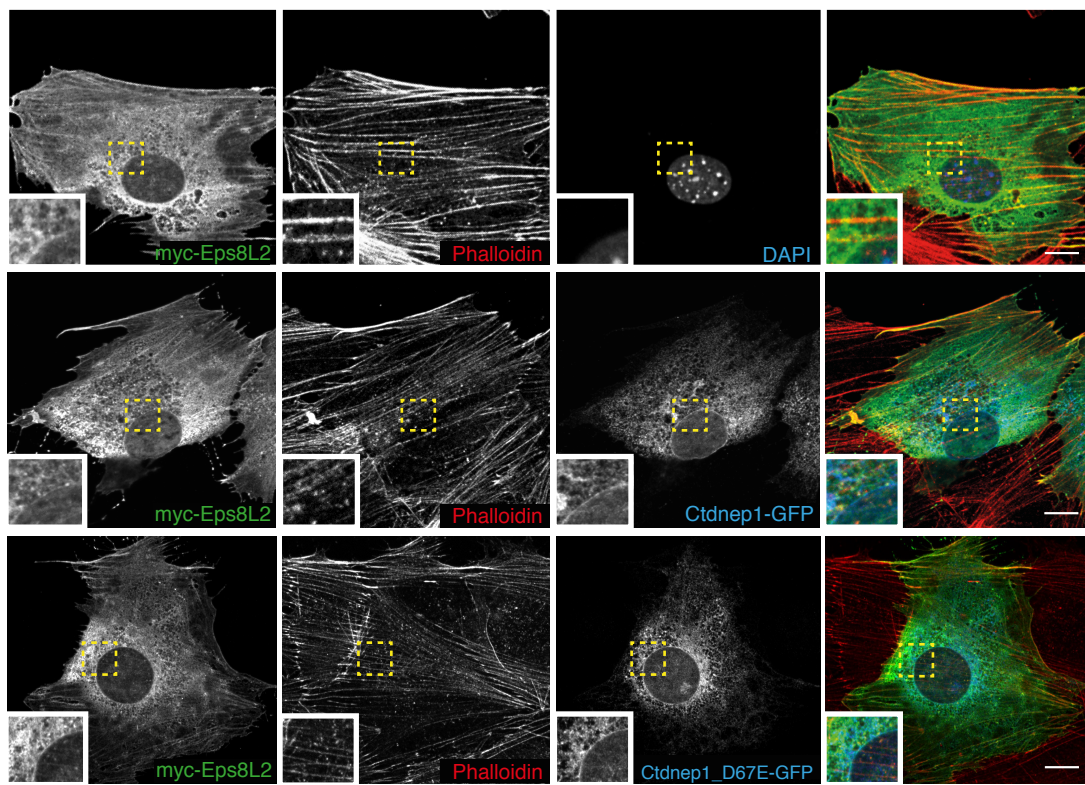**B**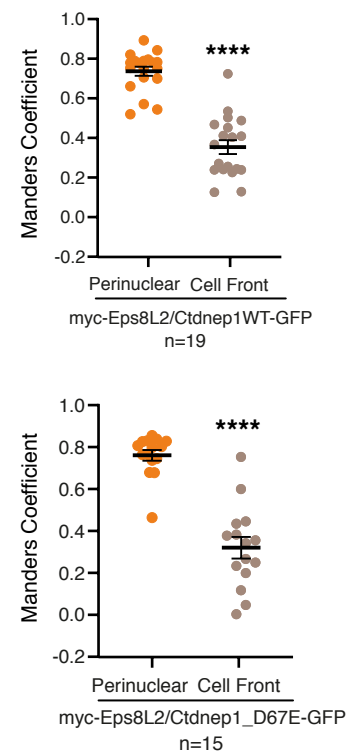**C**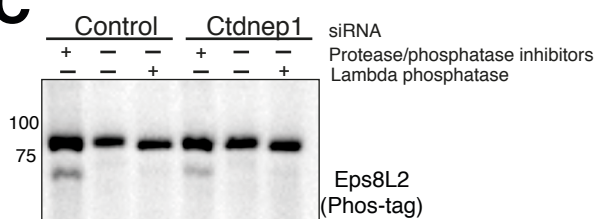**D**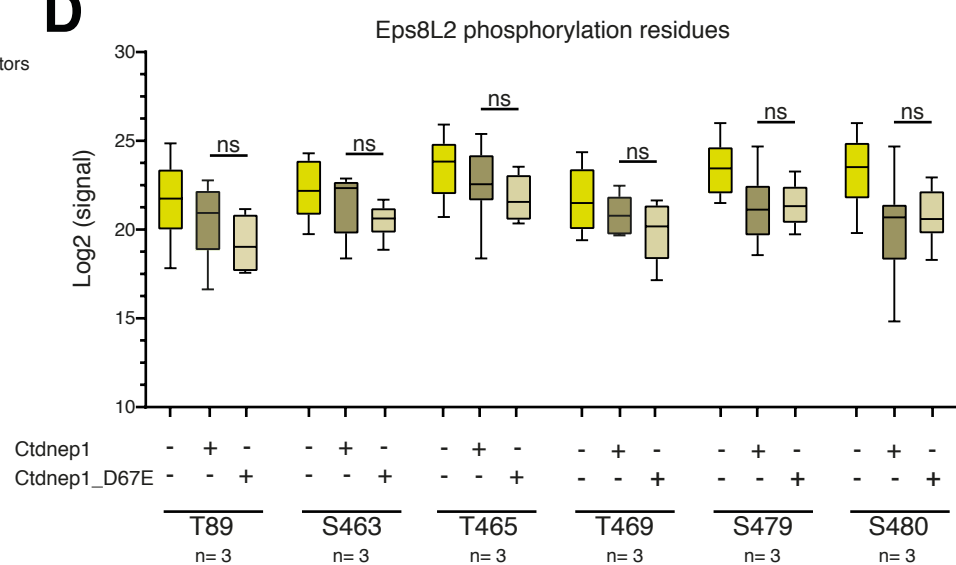**E**

Pull-Down GST-Eps8L2 + Ctdnep1

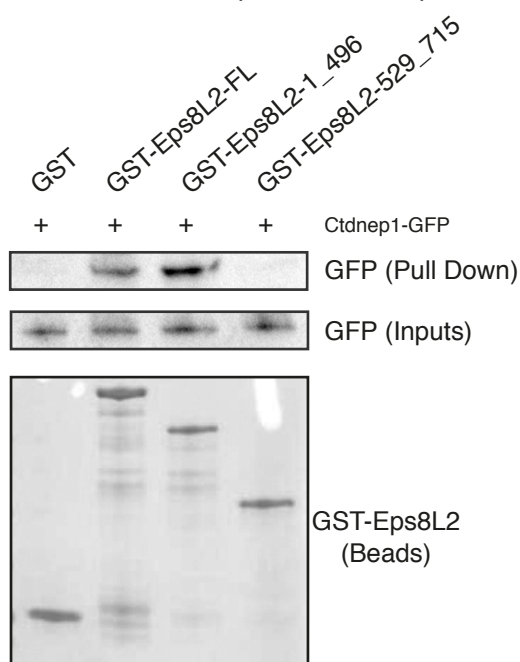**F**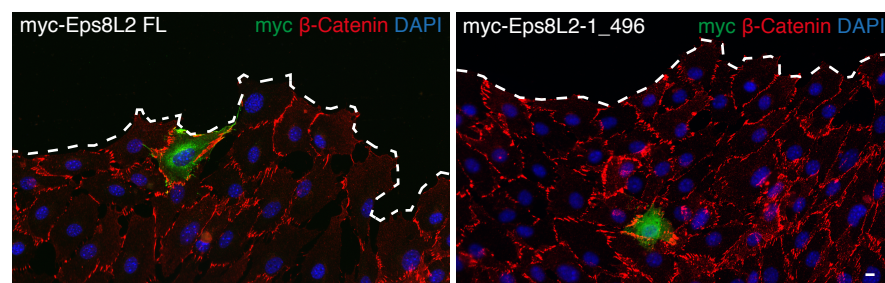**G**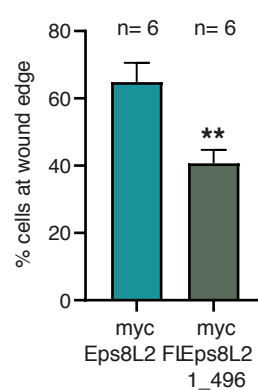**H**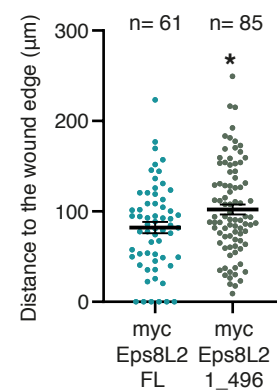

**Figure S2. Ctdnep1-Eps8L2 interaction regulates cell migration. Related to Figure 2. (A)**

Representative images of wound-edge wildtype fibroblasts stimulated with LPA and microinjected with myc-Eps8L2, Ctdnep1-GFP and Ctdnep1\_D67E-GFP stained for myc (green, Eps8L2), Phalloidin (red, Actin) DAPI (blue, nucleus) or GFP (blue, Ctdnep1 and Ctdnep1\_D67E). Dashed yellow squares indicate the regions of the insets shown in the bottom left corner. **(B)** Quantification of Eps8L2 and Ctdnep1 colocalization by analysing the Manders Coefficient in the conditions shown in A and in the perinuclear region (3  $\mu\text{m}$  from the nucleus border) or in the front cell (close to the leading edge). The n value means number of analysed cells. **(C)** Phos-tag gel for endogenous Eps8L2 in SKBR-3 cells (that express high levels of Eps8L2) treated with Control and Ctdnep1 siRNAs. Incubation with Lambda phosphatase was used as a control to remove all phosphorylation in the sample. **(D)** Plot representing the  $\text{Log}_2$  of the signal obtained in the mass spectrometry analysis for each phosphorylated residues detected in Eps8L2 with or without co-transfection with Ctdnep1 and Ctdnep1\_D67E. The plot shows the results from three independent experiments (n). **(E)** Pull Down assay of recombinant GST, GST-Eps8L2-FL, GST-Eps8L2-1\_496 and GST-Eps8L2-529\_715 proteins bound to glutathione agarose beads with Ctdnep1-GFP overexpressed in U2OS cells. **(F)** Representative images of wound closure assays in cells microinjected with myc-Eps8L2 or myc-Eps8L2\_1-496 and stained for myc (green),  $\beta$ -catenin (red, cell contacts) and DAPI (blue, nucleus). The dashed white lines mark the wound edge. **(G)** Quantification of percentage of cells at the wound edge in the wound closure experiments shown in E. Data are represented as mean  $\pm$  SEM. The n value means number of experiment ( $>10$  cells per experiment). **(H)** Quantification of average distance to the wound edge in the wound closure in the conditions shown in E. The n value means number of analysed cells. Scale bars: 10  $\mu\text{m}$ . Statistics was performed by unpaired t test: \* $p < 0.05$ , \*\* $p < 0.01$ , \*\*\* $p < 0.001$ , \*\*\*\* $p < 0.0001$ .



**A**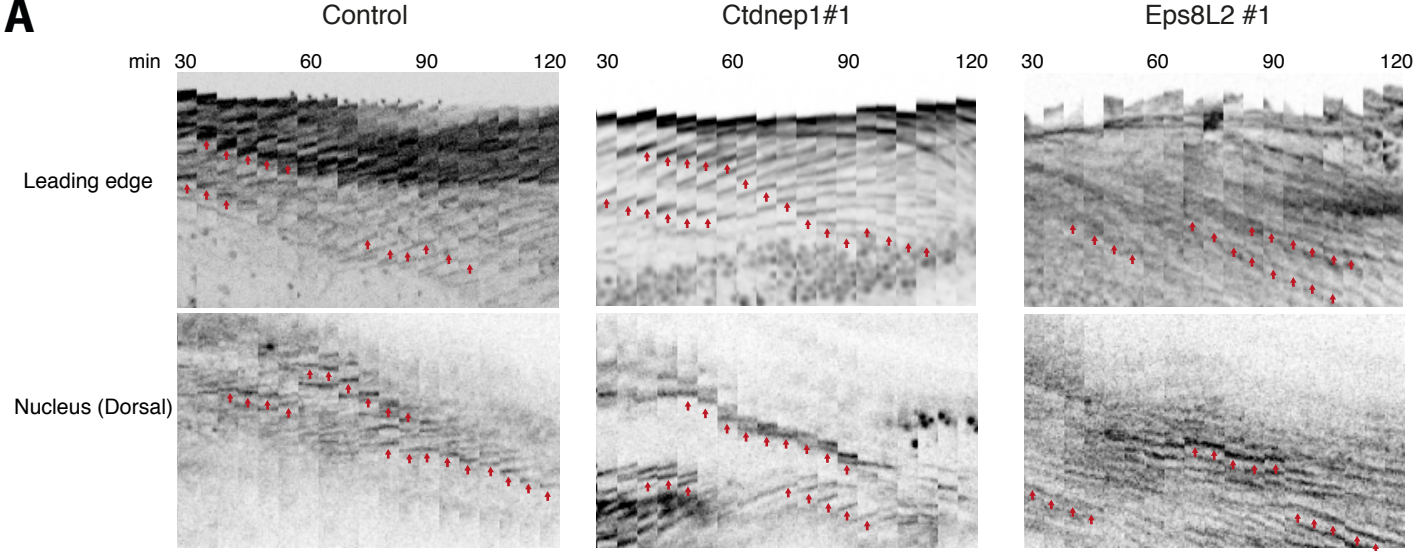**B**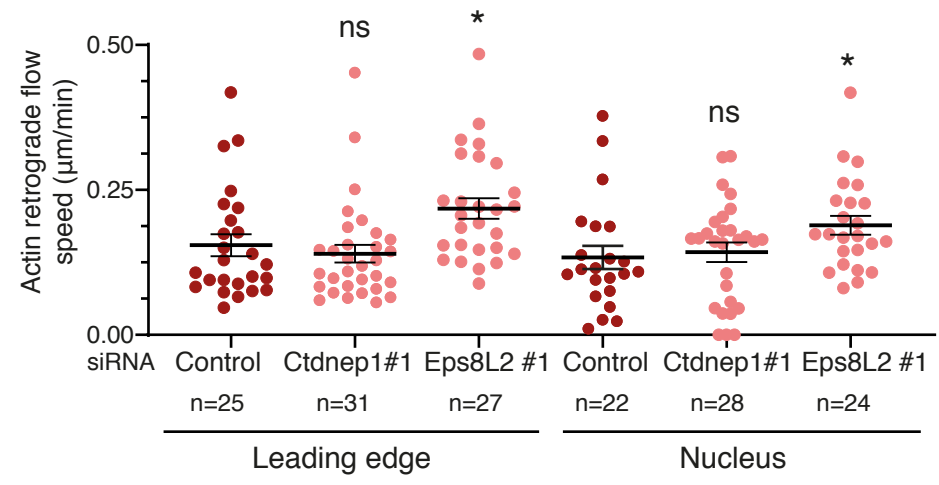**C**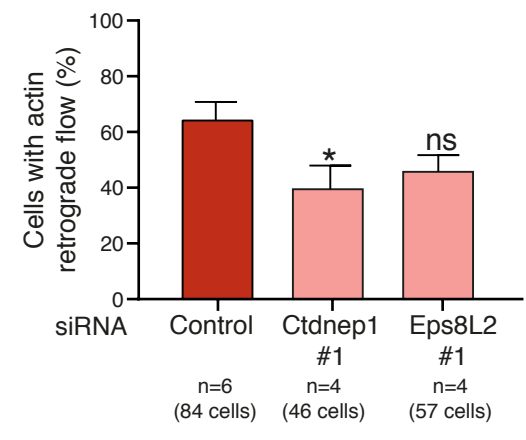

**Figure S3. Actin retrograde flow is not strongly impaired by Ctdnep1 or Eps8L2 depletions. Related to Figure 3. (A)** Kymographs of the actin retrograde flow at the leading edge (top panels) or on top of the nucleus (bottom panels) in wound-edge fibroblasts after LPA stimulation and treated with Control, Ctdnep1 or Eps8L2 siRNAs. A stable cell line of 3T3 fibroblasts expressing Lifeact-mcherry were used to measure actin retrograde flow. The red arrows indicate the movement of the actin cables. **(B)** Quantification of actin retrograde flow speed for actin filaments located near the leading edge (Leading edge) or on the dorsal side of the nucleus (Nucleus) in the conditions showed in A. **(C)** Quantification of the percentage of wound-edge fibroblasts with actin retrograde flow in the conditions shown in A. Data are represented as mean +/- SEM. The n value means number of cells (B) or experiments (C). Statistics was performed by unpaired t test: \* $p < 0.05$ , \*\* $p < 0.01$ , \*\*\* $p < 0.001$ , \*\*\*\* $p < 0.0001$ .

**A**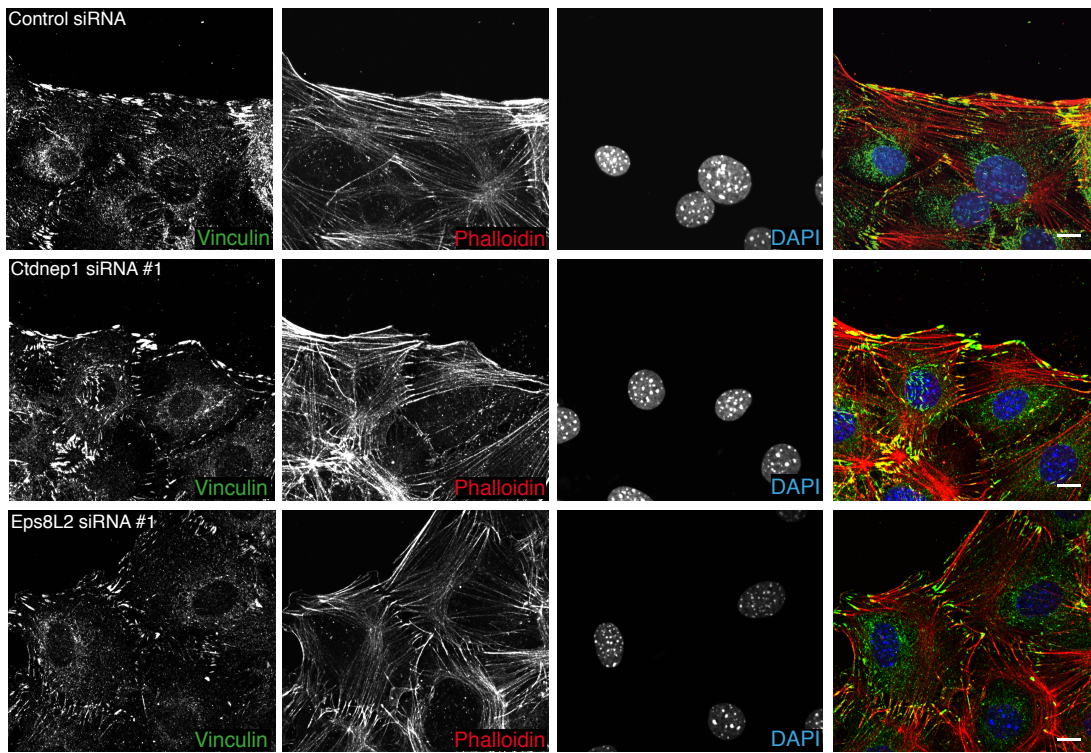**B**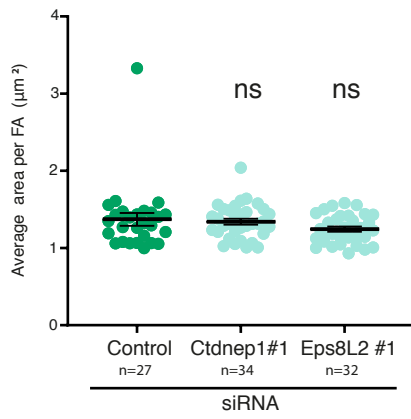**C**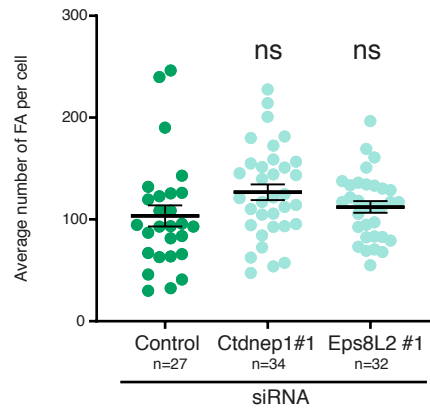**D**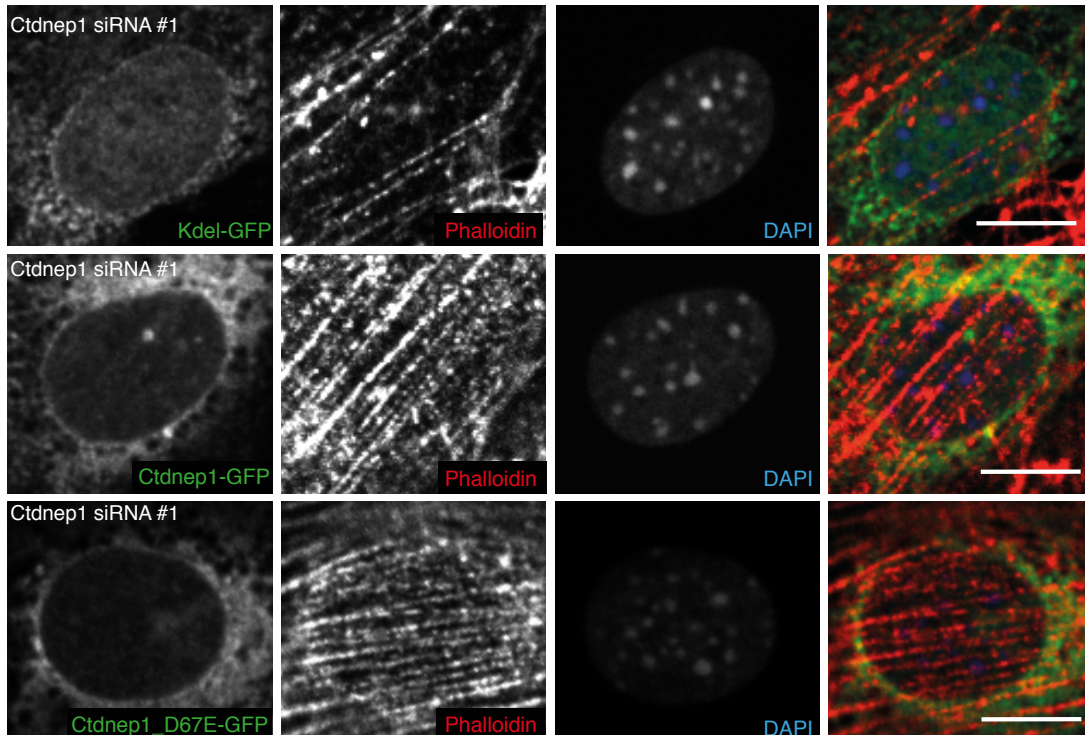

**Figure S4. Ctdnep1 or Eps8L2 depletions do not affect overall actin organization. Related to Figure 4.** (A) Representative images of wound-edge fibroblasts stimulated with LPA and treated with Control, Ctdnep1 and Eps8L2 siRNAs. Cells were stained for Vinculin (focal adhesions, green), Phalloidin (actin, red) and DAPI (nucleus, blue). (B) Quantification of average Vinculin area per focal adhesion analysed in the conditions shown in A. (C) Quantification of average number of focal adhesions analyzed in the conditions shown in A. Data are represented as mean +/- SEM. The n value means the number of cells. (D) Representative images of the nucleus of wound-edge fibroblasts stimulated with LPA, treated with Ctdnep1 siRNA and microinjected with KDEL-GFP, Ctdnep1-GFP and Ctdnep1D67E-GFP. Cells were stained for GFP (green), phalloidin (actin, red) and DAPI (nucleus, blue). Scale bars: 10  $\mu$ m. Statistics was performed by unpaired t test: \* $p < 0.05$ , \*\* $p < 0.01$ , \*\*\* $p < 0.001$ , \*\*\*\* $p < 0.0001$ .



| REAGENT or RESOURCE                                                   | SUPPLIER                 | IDENTIFIER          |
|-----------------------------------------------------------------------|--------------------------|---------------------|
| <b>Oligos used for plasmids cloning</b>                               |                          |                     |
| 5'-GGGGACAAGTTTGTACAAAAAAGCAGGCTTAAGGA<br>GGTACCATGATGCGGACGCAGTGT-3' | Sigma-Aldrich            | Ctdnep1_FL_N1_For   |
| 5'-GGGGACCACTTTGTACAAGAAAGCTGGGTCCCAGA<br>GCCTATGTTGGTGAAG-3'         | Sigma-Aldrich            | Ctdnep1_FL_N1_Rev   |
| 5'-GGGGACAAGTTTGTACAAAAAAGCAGGCTTACCCTT<br>ATCTCCTTTGTCC-3'           | Sigma-Aldrich            | Ctdnep1_Cter_C1_For |
| 5'-GGGGACCACTTTGTACAAGAAAGTGGGTCTCACCA<br>GAGCCTATGTTGGTG-3'          | Sigma-Aldrich            | Ctdnpe1_FL_C1_Rev   |
| 5'-GATCCTGGTGCTGGAAGTGGACGAAACCCTG-3'                                 | Sigma-Aldrich            | Ctdnep1_D67E_For    |
| 5'-CAGGGTTTCGTCAGTTCAGCACCAGGATC-3'                                   | Sigma-Aldrich            | Ctdnep1_D67E_Rev    |
| 5'-GATCCTGGTGCTGGAGCTGGATGAGACAC-3'                                   | Sigma-Aldrich            | hCtdnep1_D67E_For   |
| 5'-GTGTCTCATCCAGCTCCAGCACCAGGATC-3'                                   | Sigma-Aldrich            | hCtdnep1_D67E_Rev   |
| 5'-CCCCGACTGGCTCATGGAGCCTGCTTTTTTGTACA<br>AACTTGCCCC-3'               | Sigma-Aldrich            | Eps8L2_S1           |
| 5'-AAGATGCGGCCGAGTAGGACCCAGCTTCTTGAC<br>AAAGTGGTCCCC-3'               | Sigma-Aldrich            | Eps8L2_R183         |
| 5'-CAGGGTCTGCGGCCGGGAGCCTGCTTTTTTGTACAA<br>ACTTGCCCC-3'               | Sigma-Aldrich            | Eps8L2_S181         |
| 5'-GAAGGCGCCAGCAGAGTAGGACCCAGCTTCTTG<br>ACAAAGTGGTCCCC-3'             | Sigma-Aldrich            | Eps8L2_R299         |
| 5'-GGACGCCCTCTGCTGGGGAGCCTGCTTTTTTGTACA<br>AACTTGCCCC-3'              | Sigma-Aldrich            | Eps8L2_S297         |
| 5'-CTCCGTCTCTGCCATAGGACCCAGCTTCTTGAC<br>AAAGTGGTCCCC-3'               | Sigma-Aldrich            | Eps8L2_R370         |
| AGCAGTGGGCAGGAGACGGAGCCTGCTTTTTTGTACA<br>AACTTGCCCC-3'                | Sigma-Aldrich            | Eps8L2_S367         |
| 5'-ACCAGCCATGGCCAAATATTAGGACCCAGCTTCTT<br>GTACAAAGTGGTCCCC-3'         | Sigma-Aldrich            | Eps8L2_R496         |
| 5'-ACATATTTGCCATGGCTGGGGAGCCTGCTTTTTT<br>TACAAACTTGCCCC-3'            | Sigma-Aldrich            | Eps8L2_S494         |
| 5'-GTGCCCTGCAACATCCTATAGGACCCAGCTTCTTGT<br>ACAAAGTGGTCCCC-3'          | Sigma-Aldrich            | Eps8L2_R546         |
| 5'-CGCCTCGCCTAGGATGTTGGAGCCTGCTTTTTTGT<br>CAAACCTTGCCCC-3'            | Sigma-Aldrich            | Eps8L2_S544         |
| 5'-AGGGGGGAGGACAGCTAGGACCCAGCTTCTTGTA<br>CAAAGTGGTCCCC-3'             | Sigma-Aldrich            | Eps8L2_R715         |
| <b>Oligos used for RT-qPCRs</b>                                       |                          |                     |
| 5'-AGGTGAAGAGGAAGATCCTG-3'                                            | Sigma-Aldrich            | Ctdnep1_Ex3_Ms_For  |
| 5'-TTGAGGATGAAGTCGGGAGG-3'                                            | Sigma-Aldrich            | Ctdnep1_Ex3_Ms_Rev  |
| 5'-GCACCTGGCCACATTCATCA-3'                                            | Sigma-Aldrich            | Eps8L2_Ex5_Ms_For   |
| 5'-ACTCAACATCCAGCAGTCGC-3'                                            | Sigma-Aldrich            | Eps8L2_Ex5_Ms_Rev   |
| 5'-AACTTTGGCATTGTGGAAGG-3'                                            | Sigma-Aldrich            | Gapdh_Ms_For        |
| 5'-ACACATTGGGGGTAGGAACA-3'                                            | Sigma-Aldrich            | Gapdh_Ms_Rev        |
| <b>siRNAs</b>                                                         |                          |                     |
| 5'-GAUUCACUCUACCCACGAUTT-3'                                           | ThermoFisher<br>(Ambion) | Ctdnep1 siRNA #1    |

|                             |                          |                  |
|-----------------------------|--------------------------|------------------|
| 5'-GGUGGUAUAGACAAACACTT-3'  | Genecust                 | Ctdnep1 siRNA #2 |
| 5'-GCAGGUGAACGACAAGUCATT-3' | ThermoFisher<br>(Ambion) | Eps8L2 siRNA #1  |
| 5'-GGAACAAAGAAGAGCUAAUTT-3' | ThermoFisher<br>(Ambion) | Eps8L2 siRNA #2  |
| 5'-GAGAGUUUGUUGACUGUUUTT-3' | ThermoFisher<br>(Ambion) | Eps8L2 siRNA #3  |
| 5'-CCAUCAUCCUGCACUUUCATT-3' | Genecust                 | Nesprin2G siRNA  |

**Table S1. Oligonucleotides. Related to STAR Methods.**
